# Supplementary material for: Early maturation and liver necrosis in the fingerling stage of Oreochromis mossambicus due to BPA can cause an ecological imbalance
Source: Royal Society of Chemistry journal article supplement (doi:10.1039/c7ra11432j), 2018-01-01
Supplement: c7ra11432j1.pdf [file c7ra11432j1.pdf]

Supplementary Figure.

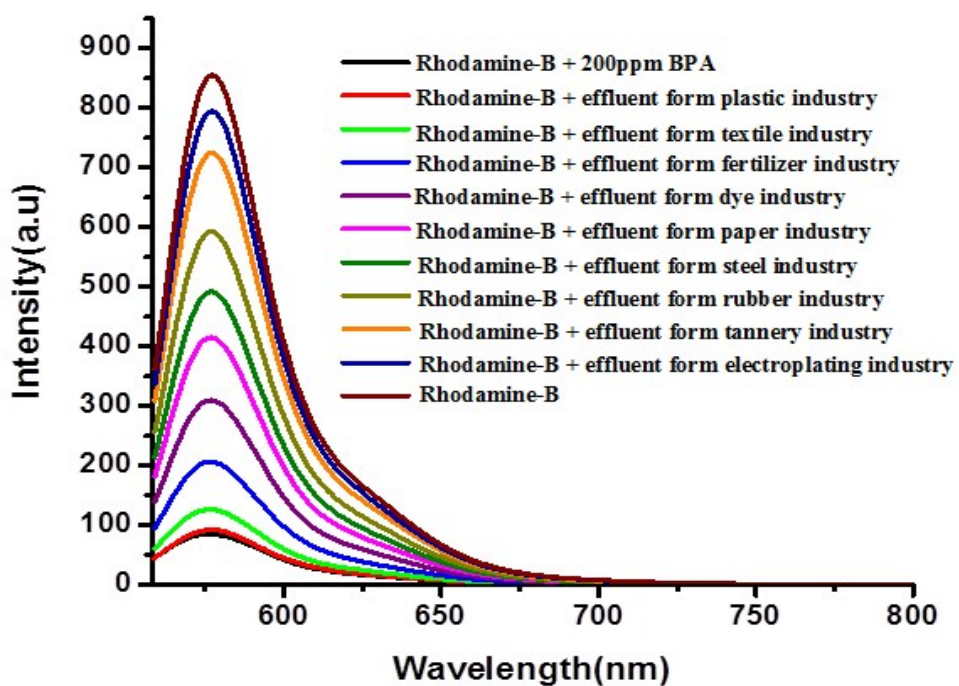

Figure: Sp-1) Detection of BPA in different effluent samples using Rhodamine-B.

(Specific peak appeared due to standard BPA).

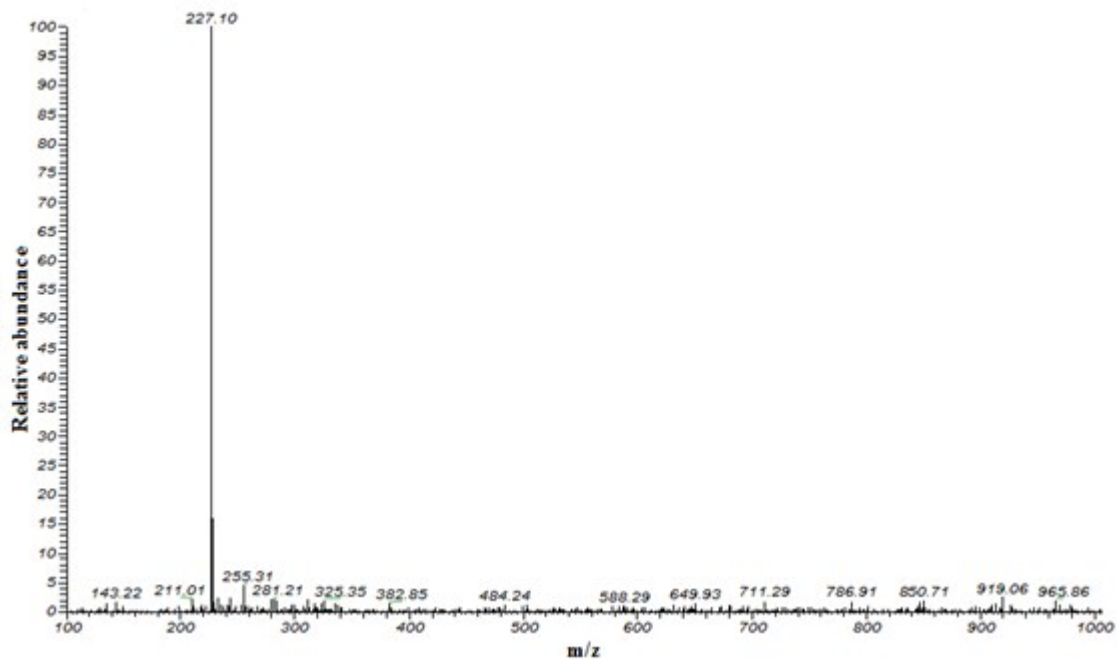

(Specific BPA peak appeared in plastic industry effluent sample).

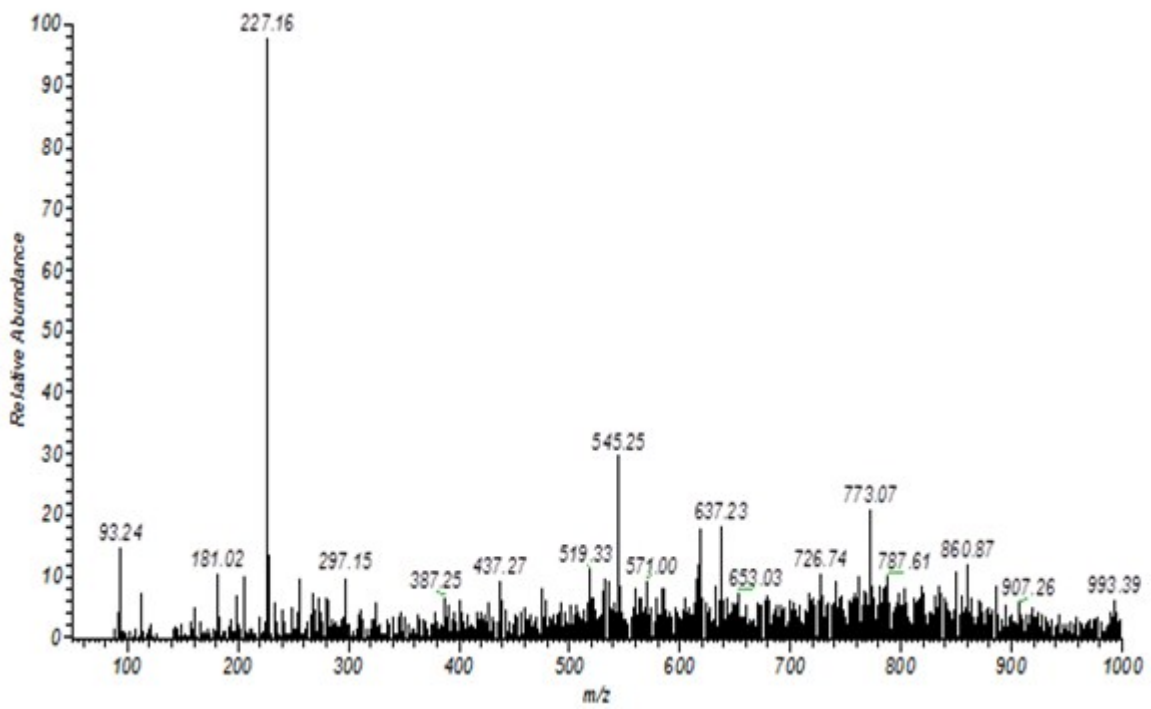

**Figure: Sp-2)** Conformation of BPA in plastic industry effluent using ESI-MS.

a) (Normal ovary of control fingerling)

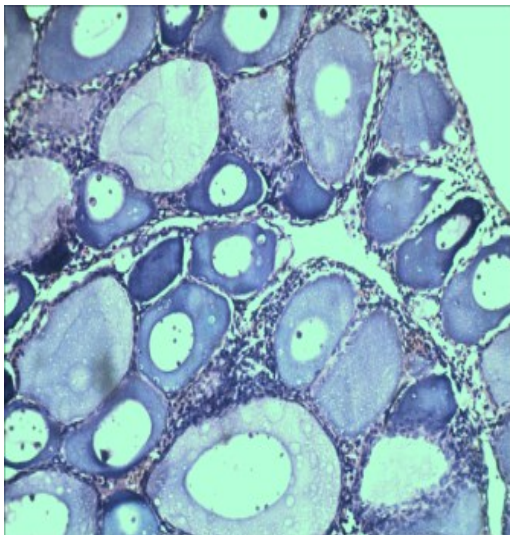

b) (Mature ovary of effluent fingerling)

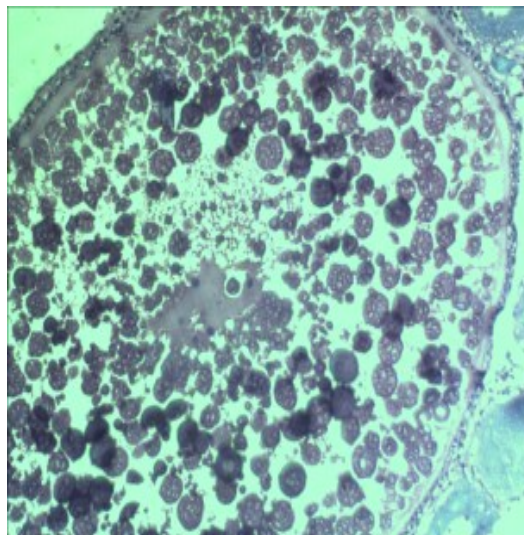

**Figure: Sp-3)** Histopathology of (a) control and (b) effluent fingerling's ovary.

a) (Normal liver of control fingerling)

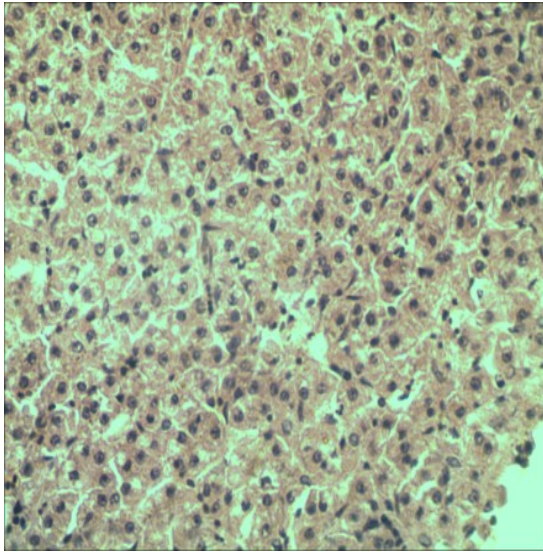

b) (Necrotic liver of effluent fingerling)

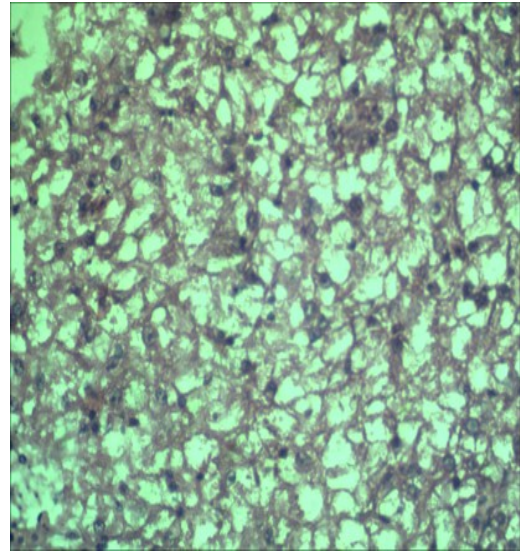

**Figure: Sp-4)** Histopathology of (a) control and (b) effluent fingerling's liver.

a) (Normal testis of control fingerling)

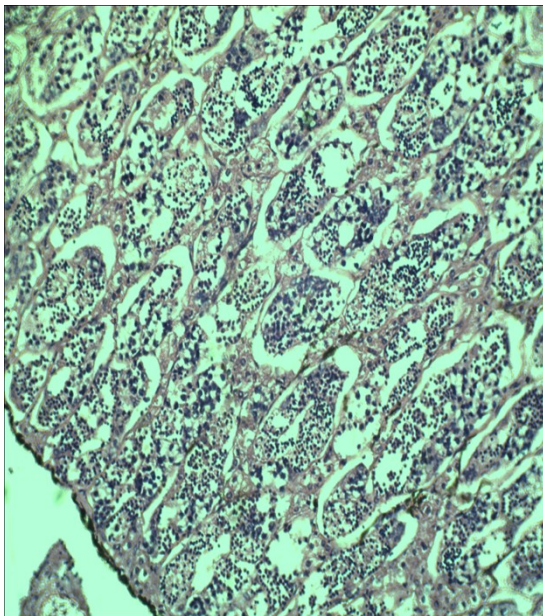

b) (Normal testis of effluent fingerling)

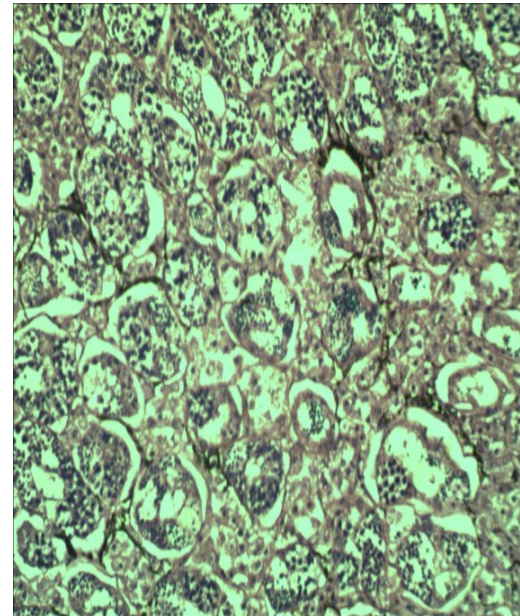

**Figure:Sp-5)** Histopathology of (a) control and (b) effluent fingerling's testis.

a) Complete mature ovary of positive control

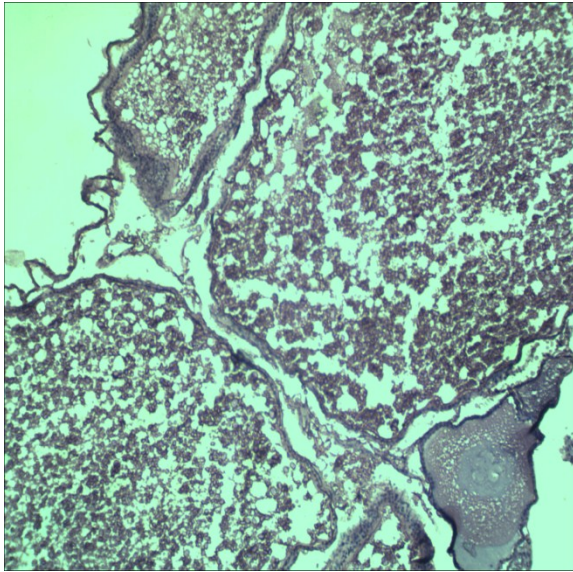

b) Complete necrotic liver of positive control

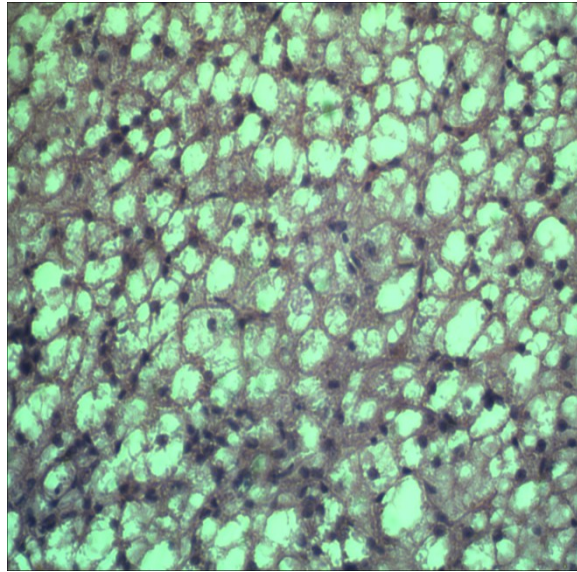

c) Normal testis of positive control

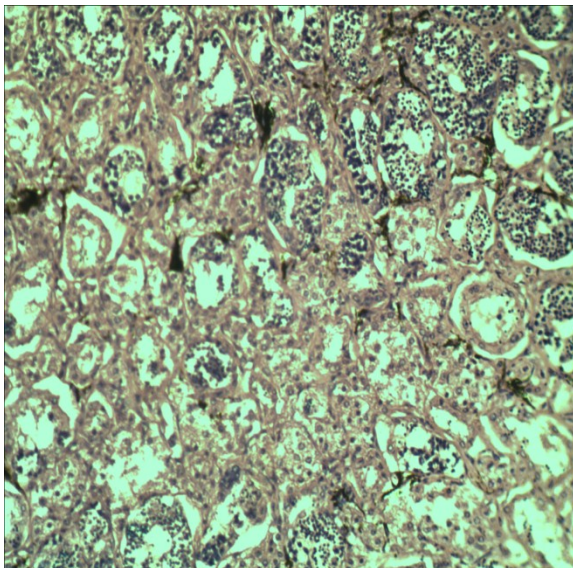

**Figure: Sp-6)** Histopathology of positive control (a) ovary, (b) liver, (c) testis.

Peaks appeared in case of effluent fingerling.

No peaks appeared in control fingerling.

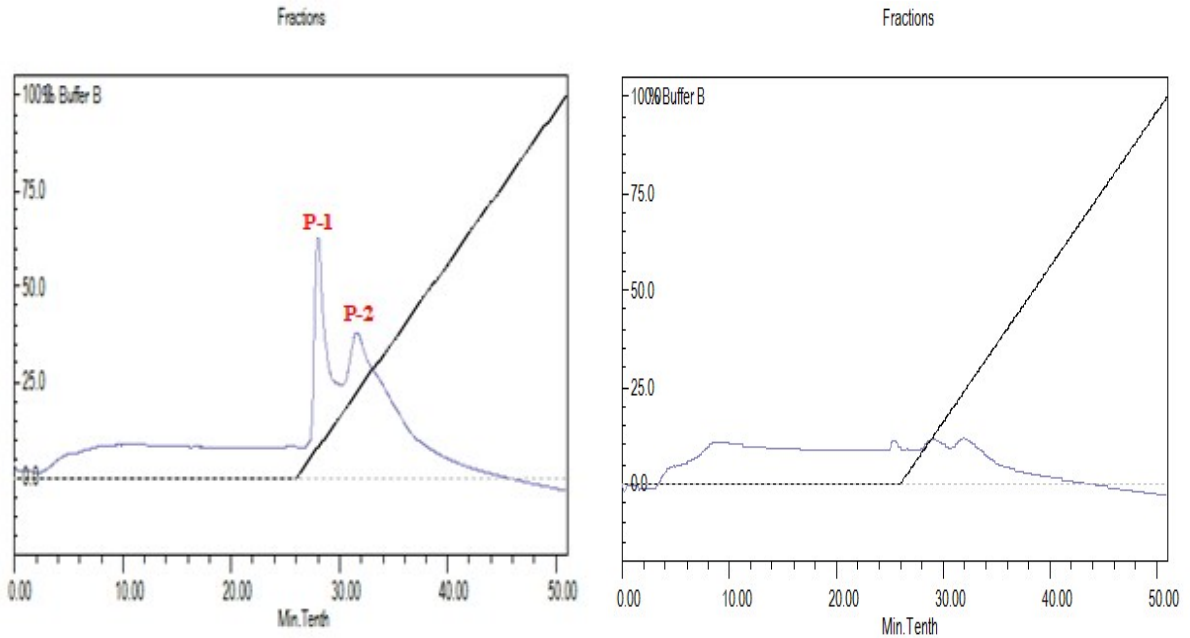

**Figure: Sp-7)** FPLC of liver fractions showed the vitellogenin peak.

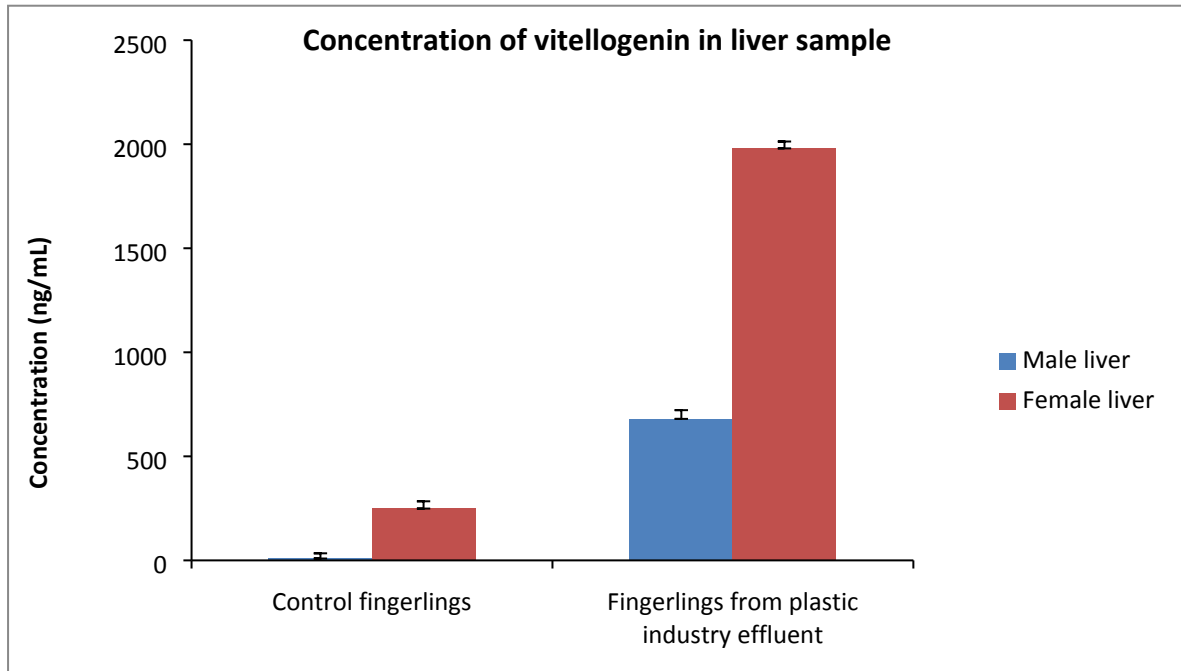

**Figure: Sp-8)** Quantification of vitellogenin in liver showed higher concentration in the fingerlings collected from plastic industry effluent.

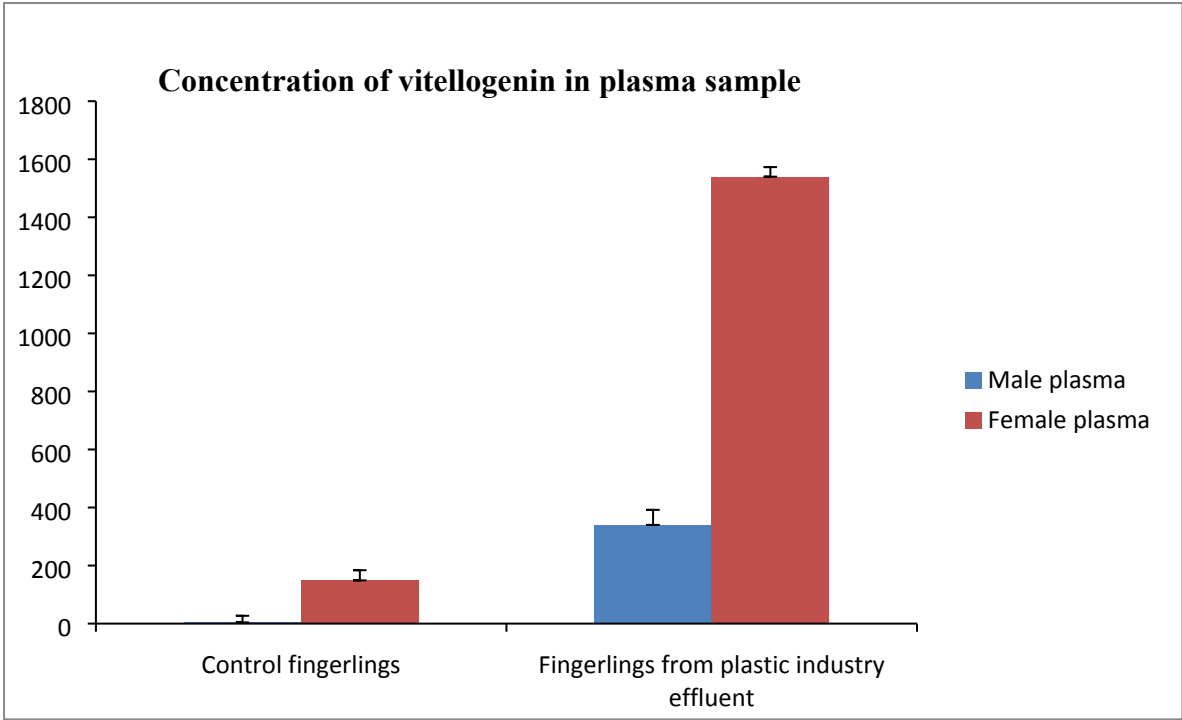

**Figure: Sp-9)** Quantification of vitellogenin in plasma showed higher concentration in the fingerlings collected from plastic industry effluent.

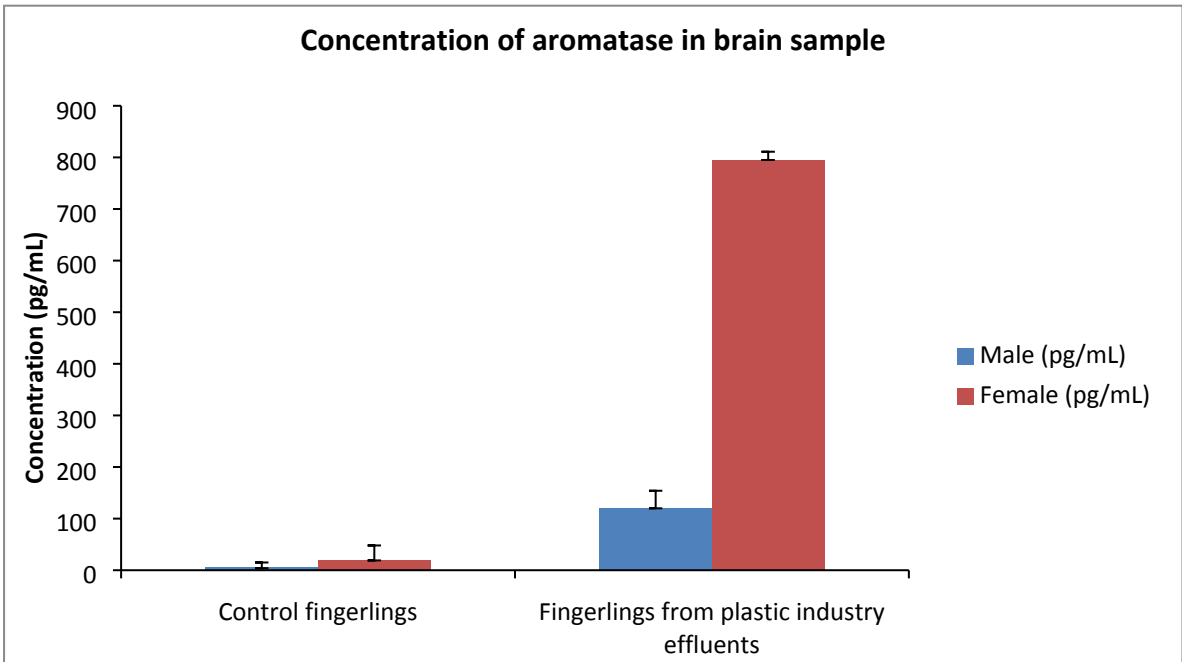

**Figure: Sp-10)** Quantification of aromatase in brain showed higher concentration in the fingerlings collected from plastic industry effluent.
